# Supplementary material for: Particulate photocatalyst sheets based on non-oxide semiconductor materials for water splitting under visible light irradiation
Source: Royal Society of Chemistry journal article supplement (doi:10.1039/c8cy00860d), 2018-01-01
Supplement: c8cy00860d1.pdf [file c8cy00860d1.pdf]

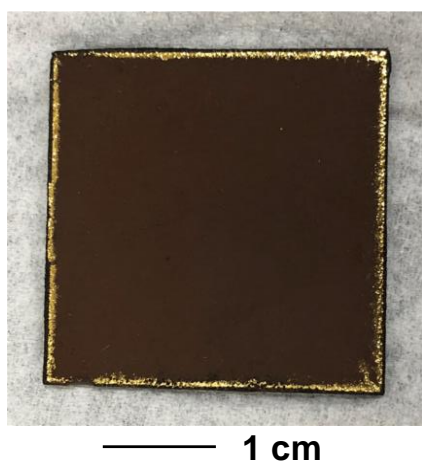

**Figure S1.** A picture of a Ga-LTCA/Au/LaTiO<sub>2</sub>N photocatalyst sheet.

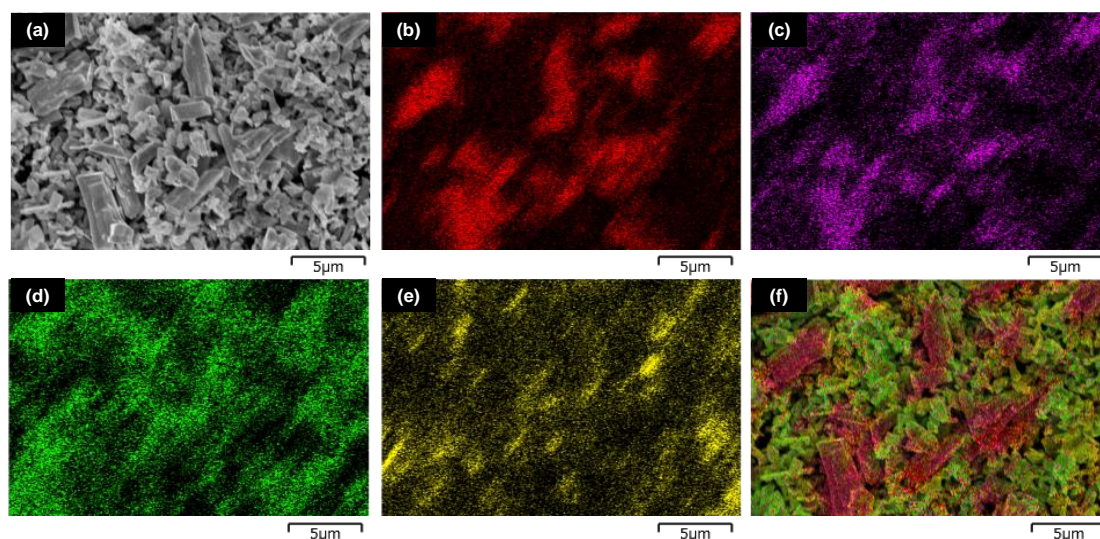

**Figure S2.** Top-view SEM-EDX mapping images of a Ga-LTCA/Au/LaTiO<sub>2</sub>N photocatalyst sheet. (a) an SEM image and (b-f) EDX mapping images for (b) S, (c) Cu, (d) N, (e) Au, and (f) superimposition of b-e.

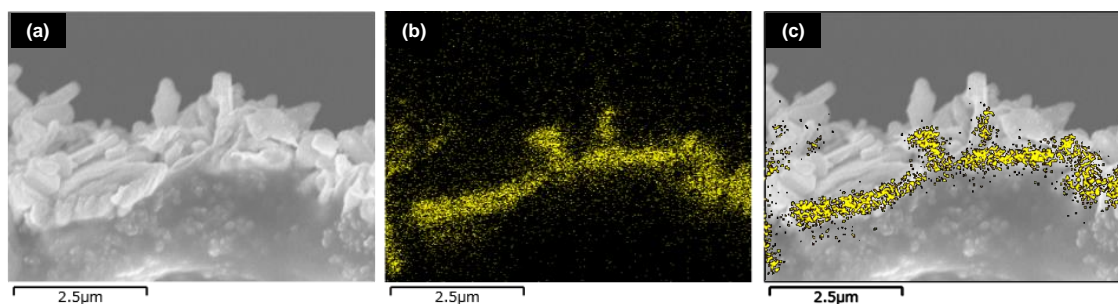

**Figure S3.** Cross-sectional view SEM-EDX mapping images of a Ga-LTCA/Au/LaTiO<sub>2</sub>N photocatalyst sheet. (a) an SEM image, (b) EDX mapping images for Au, and (c) superimposition of a,b after adjustment of the contrast for clarity.

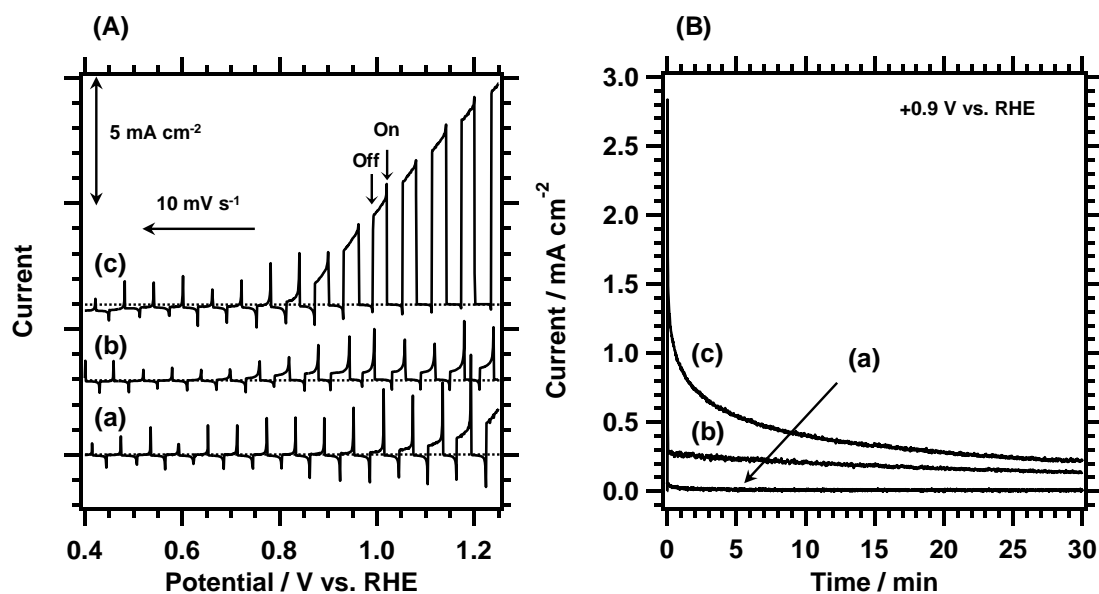

**Figure S4.** (A) Current-potential and (B) current-time profiles for LaTiO<sub>2</sub>N/Au photoanodes at pH values of (a) 6, (b) 11 and (c) 13 under chopped and continuous visible light irradiation ( $\lambda > 420$  nm) from Xe lamp, respectively. The LaTiO<sub>2</sub>N was loaded with CoO<sub>x</sub> (2 wt% as Co).

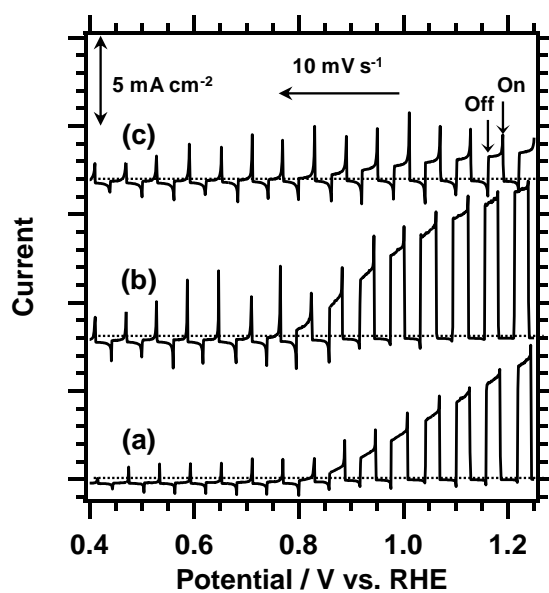

**Figure S5.** Effect of CoO<sub>x</sub> loading on LaTiO<sub>2</sub>N on current-potential curves for LaTiO<sub>2</sub>N/Au photoanodes at pH 13 under chopped visible light irradiation ( $\lambda > 420$  nm) from Xe lamp. CoO<sub>x</sub> loadings were (a) 2, (b) 5 and (c) 10 wt%.

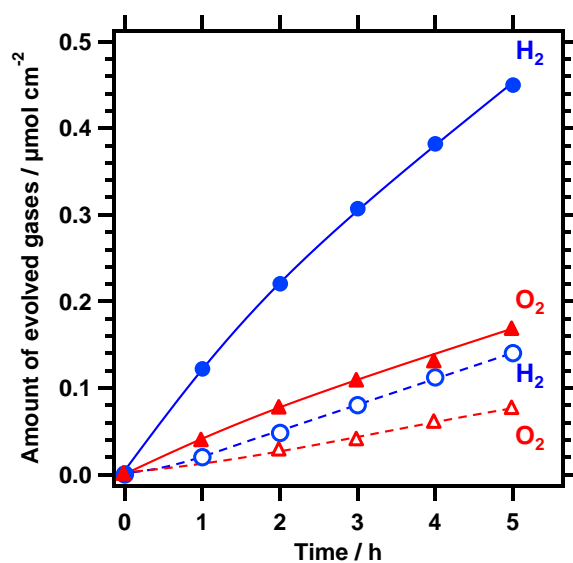

**Figure S6.** Time courses of gas evolution during water splitting reactions under using a Ga-LTCA/Au/LaTiO<sub>2</sub>N photocatalyst sheet (ca. 9 cm<sup>2</sup>) and short-circuited Ga-LTCA/Au photocathode (1.4 cm<sup>2</sup>) and CoO<sub>x</sub>/LaTiO<sub>2</sub>N/Au photoanode (1.1 cm<sup>2</sup>) at pH 11 under visible light irradiation ( $\lambda > 420$  nm) from Xe lamp. Closed and open symbols represent the photocatalyst sheet and the short-circuited photoelectrodes, respectively. The LaTiO<sub>2</sub>N was loaded with CoO<sub>x</sub> (5 wt% as Co). The samples were modified with Rh species.
